# Supplementary material for: Genome-wide Development of Insertion-deletion (InDel) Markers Database for Cannabis and its uses for Genetic Structure Analysis of Chinese Germplasm and Identification of Sex-linked Marker
Source: Research Square preprint supplement (doi:10.21203/rs.3.rs-265241/v1), 2021-03-04
Supplement: Supplementary file 1 [file 371a9b75885184294b4510ba.doc]

Support Information

Table S2 The primers used for screen of sex-linked Indel markers

| Name | Chromosome | Position | FORWARD PRIMER1 (5'-3') | REVERSE PRIMER1 (5'-3') |
| --- | --- | --- | --- | --- |
| I1-1 | Chr1 | 5107359 | CCCTTGCACACTTATTTGACTAGT | CCATTGCTGTTTATATTCGGGTGG |
| I1-2 | Chr1 | 15085501 | GACAAGTTGAAGGTTTTAGGAGGC | TGAACAACTCTTCACACCTTGTAG |
| I1-3 | Chr1 | 25146673 | TCCTCGTTGAATCCACTCTTACAA | CGCTAAGTGTTTTAAGGGGCAAAT |
| I1-4 | Chr1 | 35070118 | CGATACAATCTAAGGGGAGTAGGC | CTGAGAGTTAGCACCACCATTTTG |
| I1-5 | Chr1 | 45016405 | CATTCCACTATGTTGACGATACTGT | AGCATAGGTGATAACTGTTGGGTT |
| I1-6 | Chr1 | 55100664 | TCAGTTAATAATCGCACGCACATC | GATCCTGGTTCGTGAAATTGATGG |
| I1-7 | Chr1 | 65257249 | TTGGGCTCATGTGTTGTTTGATAC | AGACAACCAACCCATACCAAGAAT |
| I1-8 | Chr1 | 75056780 | TCAACCAACACACTTCAATCCATG | GAGTTTTGTGTTTCTGTGGCTGTA |
| I1-9 | Chr1 | 85080432 | CAAAGGACTTAGACCCAGAACTGA | GGGTTTAGATCTCAGTCTGGGTTT |
| I1-10 | Chr1 | 90191387 | ACCTAACGATTTCCAAAAGC | ACCAAACGTTCTTTCTTTGC |
| I1-11 | Chr1 | 100584507 | TGAGGGAAGGGTATTTTGTCAA | TCTGTCTTAACACAAATCCGACCT |

Table S3 Blast results of I1-10 from the NCBI database


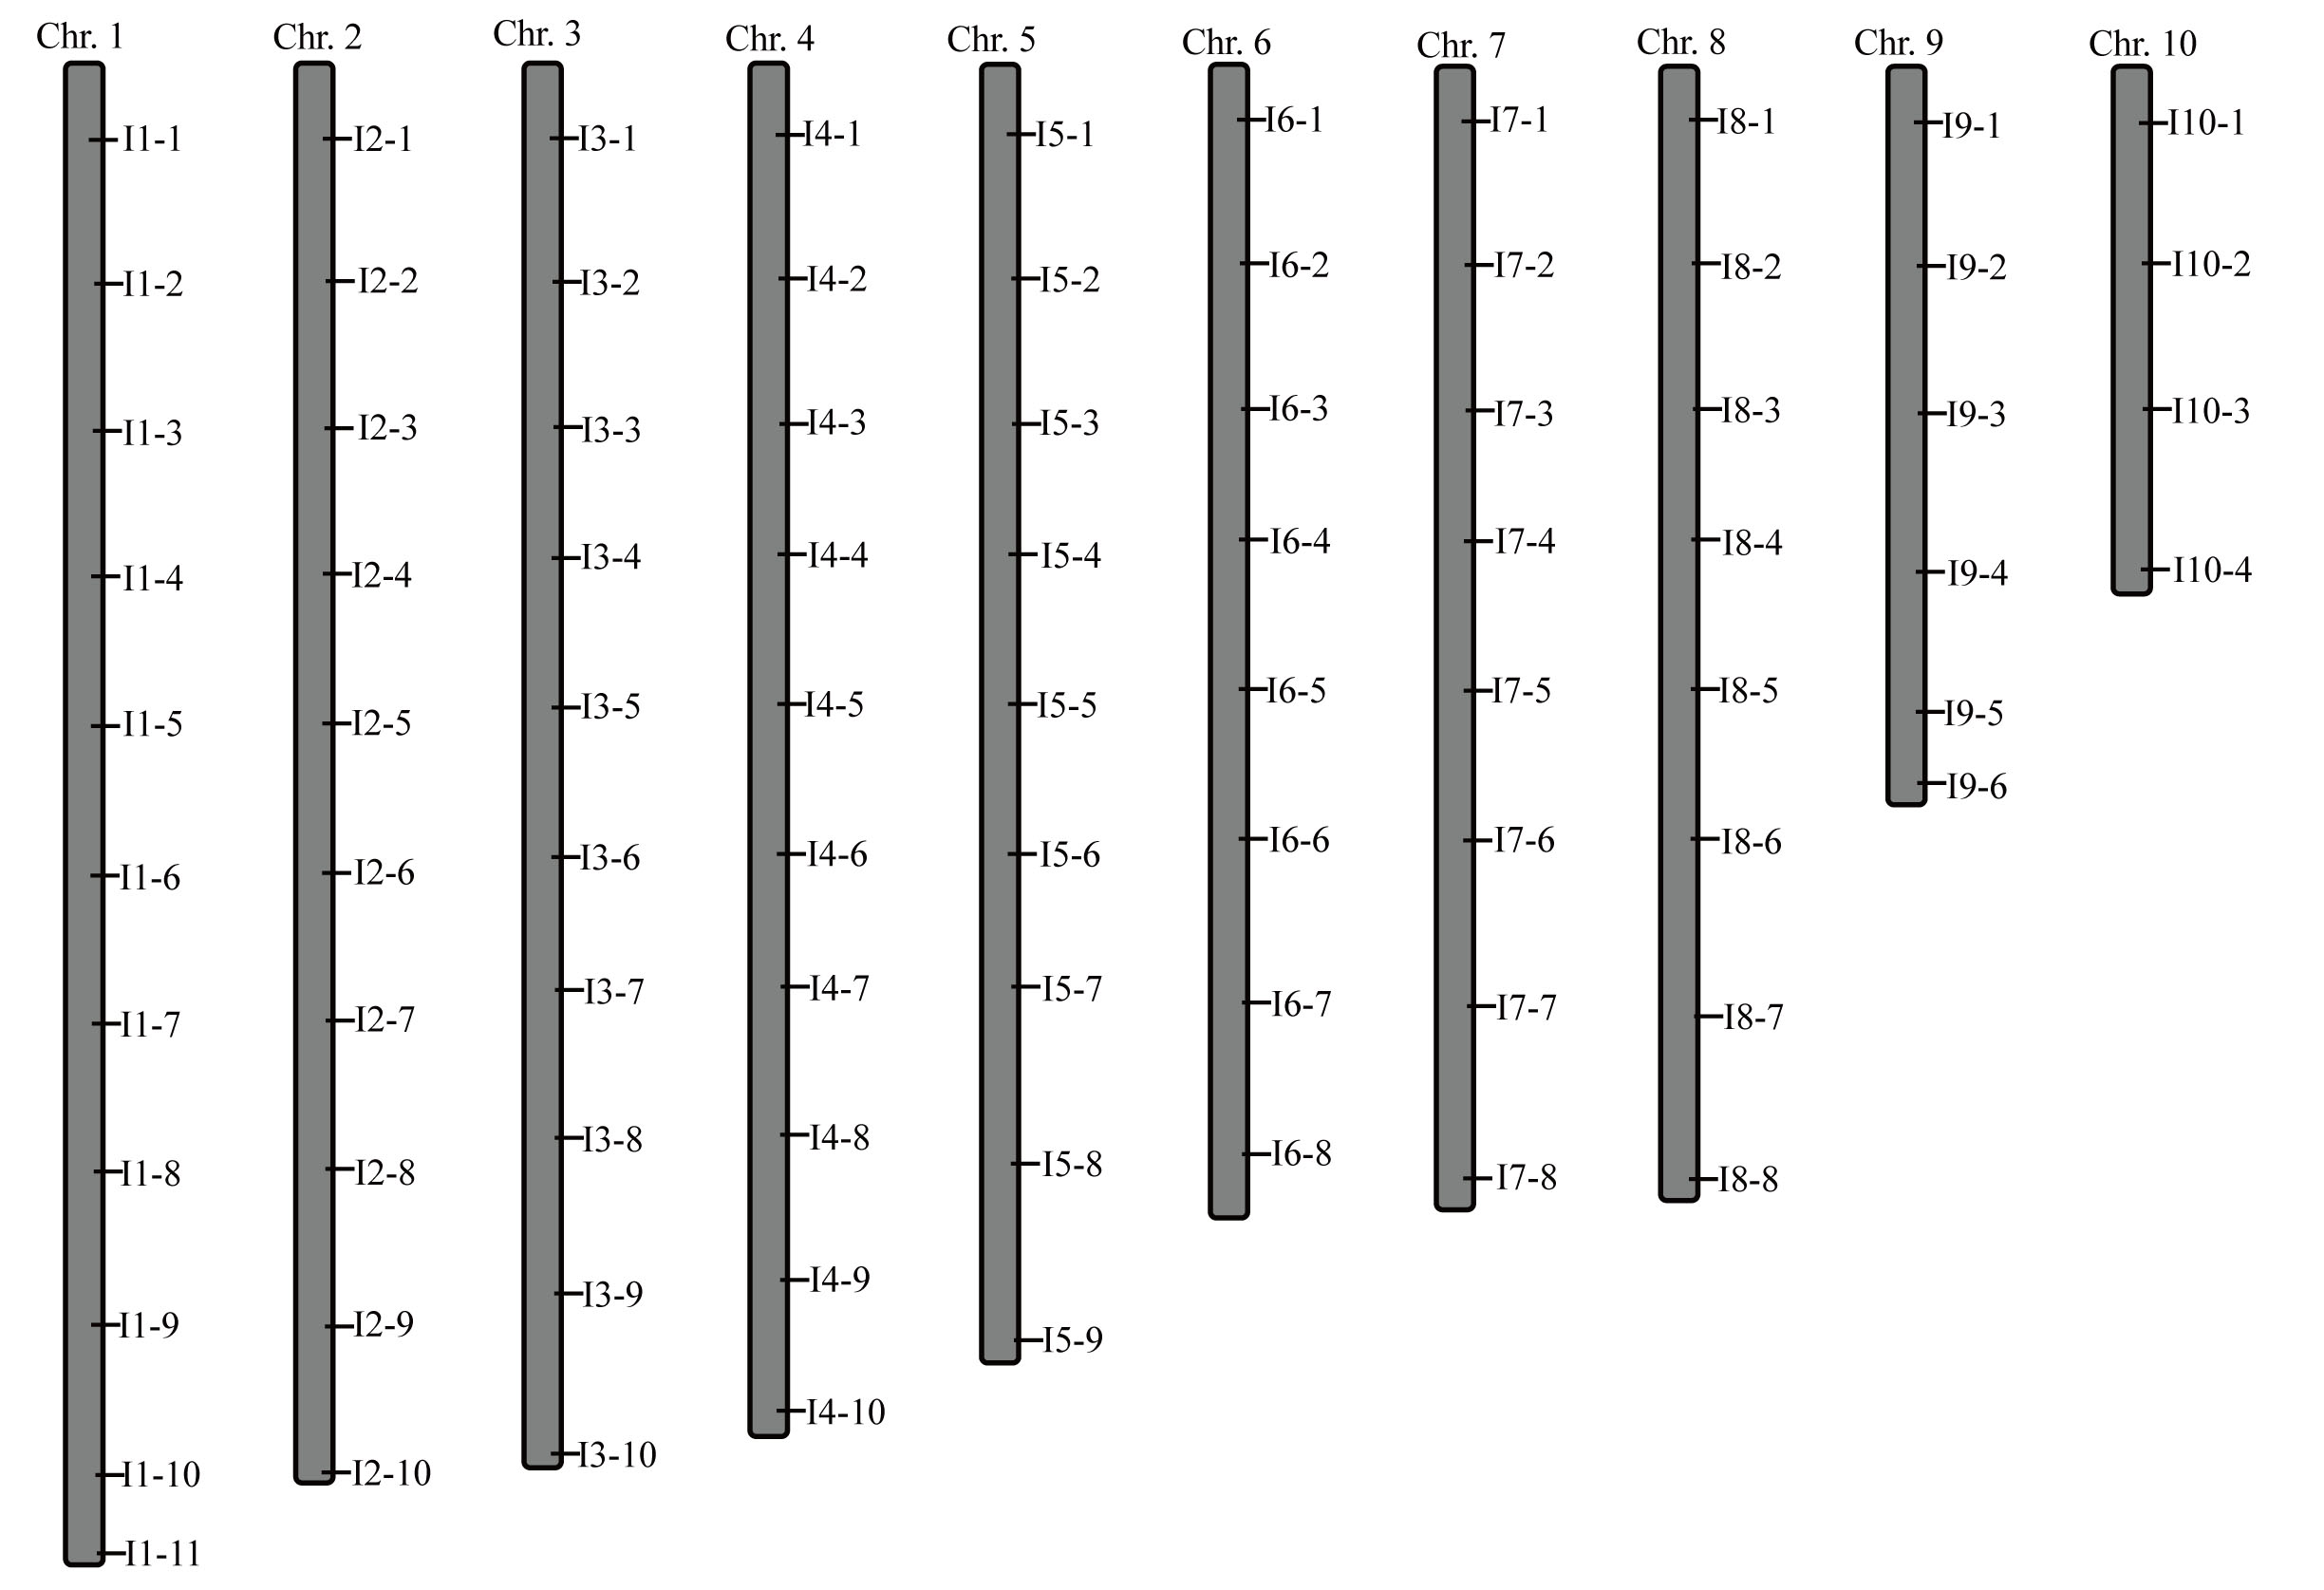


**Fig. S1** The physical location of 84 InDel primers on Cannabis chromosome used in this study


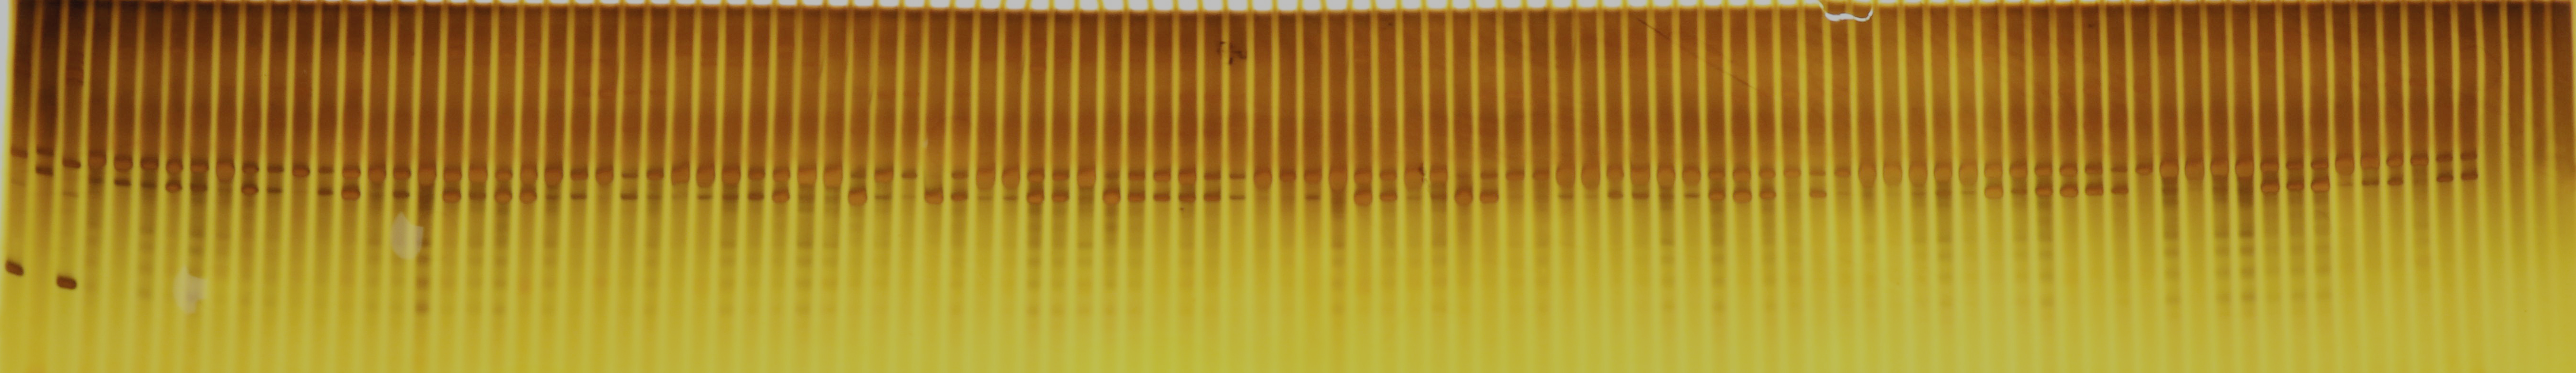


M

M

**Fig. S2** Amplification products from 96 Cannabis cultivars using the Indel markers I1-2

M：500 bp marker
